# Supplementary material
Source: ML conference proceedings conference paper supplement (https://openreview.net/forum?id=Eec8D4UNceq)
Supplement: supplementary_material [file attachment]

---

# Supplementary material for *An analysis of Ermakov-Zolotukhin quadrature using kernels*

---

**Ayoub Belhadji**  
Univ Lyon, ENS de Lyon  
Inria, CNRS, UCBL  
LIP UMR 5668, Lyon, France  
ayoub.belhadji@ens-lyon.fr

## A Detailed proofs

### A.1 Proof of Proposition 2

By definition, we have

$$\forall x_1, x_2 \in \mathcal{X}, \kappa_N^\gamma(x_1, x_2) = \sum_{n \in [N]} \gamma_n \phi_n(x_1) \phi_n(x_2), \quad (1)$$

therefore

$$\forall x_1, x_2 \in \mathcal{X}, \kappa_N^\gamma(x_1, x_2) = \sum_{n \in [N]} \rho_n \phi_n(x_1) \tilde{\gamma}_n \phi_n(x_2), \quad (2)$$

where

$$\forall n \in [N], \rho_n = \frac{\gamma_n}{\tilde{\gamma}_n}. \quad (3)$$

Then

$$\forall \mathbf{x} \in \mathcal{X}^N, \kappa_N^\gamma(\mathbf{x}) = \Phi_N^\rho(\mathbf{x})^\top \Phi_N^{\tilde{\gamma}}(\mathbf{x}), \quad (4)$$

where

$$\Phi_N^\rho(\mathbf{x}) = (\rho_n \phi_n(x_i))_{(n,i) \in [N] \times [N]} \in \mathbb{R}^{N \times N}, \quad (5)$$

and

$$\Phi_N^{\tilde{\gamma}}(\mathbf{x}) = (\tilde{\gamma}_n \phi_n(x_i))_{(n,i) \in [N] \times [N]} \in \mathbb{R}^{N \times N}. \quad (6)$$

Moreover, by definition of  $\mu_g^\gamma$ , we have

$$\forall x \in \mathcal{X}, \mu_g^\gamma(x) = \sum_{n \in [N]} \gamma_n \langle g, \phi_n \rangle_\omega \phi_n(x), \quad (7)$$

therefore

$$\forall x \in \mathcal{X}, \mu_g^\gamma(x) = \sum_{n \in [N]} \tilde{\gamma}_n \langle g, \phi_n \rangle_\omega \rho_n \phi_n(x), \quad (8)$$

so that

$$\forall \mathbf{x} \in \mathcal{X}^N, \mu_g^\gamma(\mathbf{x}) = \Phi_N^\rho(\mathbf{x})^\top \boldsymbol{\alpha}, \quad (9)$$

where

$$\boldsymbol{\alpha} = (\tilde{\gamma}_n)_{n \in [N]} \in \mathbb{R}^N. \quad (10)$$

Combining (4) and (9), we prove that for any  $\mathbf{x} \in \mathcal{X}^N$  such that  $\text{Det } \kappa_N(\mathbf{x}) > 0$ , we have

$$\begin{aligned}
\hat{\mathbf{w}}^{\gamma, N, g}(\mathbf{x}) &= \kappa_N^\gamma(\mathbf{x})^{-1} \mu_g^\gamma(\mathbf{x}) \\
&= \Phi_N^{\tilde{\gamma}}(\mathbf{x})^{-1} \Phi_N^\rho(\mathbf{x})^{-\top} \mu_g^\gamma(\mathbf{x}) \\
&= \Phi_N^{\tilde{\gamma}}(\mathbf{x})^{-1} \Phi_N^\rho(\mathbf{x})^{-\top} \Phi_N^\rho(\mathbf{x})^\top \boldsymbol{\alpha} \\
&= \Phi_N^{\tilde{\gamma}}(\mathbf{x})^{-1} \boldsymbol{\alpha}.
\end{aligned} \tag{11}$$

## A.2 Useful results

We gather in this section some results that will be useful in the following proofs.

### A.2.1 A useful lemma

We prove in the following a lemma that we will use in Section A.3.

**Lemma 1.** *Let  $\mathbf{x} \in \mathcal{X}^N$  such that  $\text{Det } \kappa_N(\mathbf{x}) > 0$ . For  $n, n' \in [N]$ , define*

$$\tau_{n, n'}(\mathbf{x}) = \sqrt{\sigma_n} \sqrt{\sigma_{n'}} \phi_n(\mathbf{x})^\top \mathbf{K}_N(\mathbf{x})^{-1} \phi_{n'}(\mathbf{x}). \tag{12}$$

Then

$$\forall n, n' \in [N], \tau_{n, n'}(\mathbf{x}) = \delta_{n, n'}. \tag{13}$$

*Proof.* We have

$$\mathbf{K}_N(\mathbf{x}) = \Phi_N^{\sqrt{\sigma}}(\mathbf{x})^\top \Phi_N^{\sqrt{\sigma}}(\mathbf{x}), \tag{14}$$

where

$$\Phi_N^{\sqrt{\sigma}}(\mathbf{x}) = (\sqrt{\sigma_n} \phi_n(x_i))_{(n, i) \in [N] \times [N]}. \tag{15}$$

Let  $n, n' \in [N]$ . We have

$$\sqrt{\sigma_n} \phi_n(\mathbf{x})^\top = \mathbf{e}_n^\top \Phi_N^\sigma(\mathbf{x}), \tag{16}$$

and

$$\sqrt{\sigma_{n'}} \phi_{n'}(\mathbf{x}) = \Phi_N^\sigma(\mathbf{x})^\top \mathbf{e}_{n'}. \tag{17}$$

Therefore

$$\tau_{n, n'}(\mathbf{x}) = \mathbf{e}_n^\top \Phi_N^\sigma(\mathbf{x}) (\Phi_N^\sigma(\mathbf{x})^\top \Phi_N^\sigma(\mathbf{x}))^{-1} \Phi_N^\sigma(\mathbf{x})^\top \mathbf{e}_{n'} \tag{18}$$

$$= \mathbf{e}_n^\top \Phi_N^\sigma(\mathbf{x}) \Phi_N^\sigma(\mathbf{x})^{-1} \Phi_N^\sigma(\mathbf{x})^\top \mathbf{e}_{n'} \tag{19}$$

$$= \mathbf{e}_n^\top \mathbf{e}_{n'} \tag{20}$$

$$= \delta_{n, n'}. \tag{21}$$

□

### A.2.2 A borrowed result

We recall in the following a result proven in [1] that we will use in Section A.4.

**Proposition 1.** *[Theorem 1 in [1]] Let  $\mathbf{x}$  be a random subset of  $\mathcal{X}$  that follows the distribution of DPP of kernel  $\kappa_N$  and reference measure  $\omega$ . Let  $f \in \mathcal{L}_2(\omega)$ , and  $n, n' \in [N]$  such that  $n \neq n'$ . Then*

$$\text{COVDPP}(I^{\text{EZ}, n}(f), I^{\text{EZ}, n'}(f)) = 0. \tag{22}$$

## A.3 Proof of Proposition 5

Let  $\mathbf{x} \in \mathcal{X}^N$  such that the condition  $\text{Det } \kappa_N(\mathbf{x}) > 0$  is satisfied, and let  $g \in \mathcal{E}_N$ . We start by the proof of (36). By definition of  $\mu_g$ , we have

$$\mu_g(x) = \sum_{n \in [N]} \sigma_n \langle g, \phi_n \rangle_\omega \phi_n(x), \tag{23}$$

so that

$$\mu_g(\mathbf{x}) = \sum_{n \in [N]} \sigma_n \langle g, \phi_n \rangle_\omega \phi_n(\mathbf{x}). \tag{24}$$

Proposition 2 yields

$$\hat{\mathbf{w}}^{\text{EZ},g} = \mathbf{K}_N(\mathbf{x})^{-1} \mu_g(\mathbf{x}). \quad (25)$$

Therefore

$$\begin{aligned} \hat{\mathbf{w}}^{\text{EZ},g^\top} \mu_g(\mathbf{x}) &= \mu_g(\mathbf{x}) \mathbf{K}_N(\mathbf{x})^{-1} \mu_g(\mathbf{x}) \\ &= \sum_{n,n' \in [N]} \sigma_n \sigma_{n'} \langle g, \phi_n \rangle_\omega \langle g, \phi_{n'} \rangle_\omega \phi_n(\mathbf{x})^\top \mathbf{K}_N(\mathbf{x})^{-1} \phi_{n'}(\mathbf{x}) \\ &= \sum_{n \in [N]} \sigma_n \langle g, \phi_n \rangle_\omega^2 \tau_{n,n}(\mathbf{x}) \\ &\quad + \sum_{\substack{n,n' \in [N] \\ n \neq n'}} \sqrt{\sigma_n \sigma_{n'}} \langle g, \phi_n \rangle_\omega \langle g, \phi_{n'} \rangle_\omega \tau_{n,n'}(\mathbf{x}), \end{aligned} \quad (26)$$

where  $\tau_{n,n'}(\mathbf{x})$  is defined by

$$\tau_{n,n'}(\mathbf{x}) = \sqrt{\sigma_n \sigma_{n'}} \phi_n(\mathbf{x})^\top \mathbf{K}_N(\mathbf{x})^{-1} \phi_{n'}(\mathbf{x}). \quad (27)$$

Now, Lemma 1 yields

$$\begin{aligned} \sum_{n \in [N]} \sigma_n \langle g, \phi_n \rangle_\omega^2 \tau_{n,n}(\mathbf{x}) &= \sum_{n \in [N]} \sigma_n \langle g, \phi_n \rangle_\omega^2 \\ &= \|\mu_g\|_{\mathcal{F}}^2, \end{aligned} \quad (28)$$

and

$$\sum_{\substack{n,n' \in [N] \\ n \neq n'}} \sqrt{\sigma_n \sigma_{n'}} \langle g, \phi_n \rangle_\omega \langle g, \phi_{n'} \rangle_\omega \tau_{n,n'}(\mathbf{x}) = 0. \quad (29)$$

Combining (26), (28) and (29), we obtain

$$\hat{\mathbf{w}}^{\text{EZ},g^\top} \mu_g(\mathbf{x}) = \|\mu_g\|_{\mathcal{F}}^2. \quad (30)$$

We move now to the proof of (37). We have by the Mercer decomposition

$$\mathbf{K}(\mathbf{x}) = \sum_{m=1}^{+\infty} \sigma_m \phi_m(\mathbf{x}) \phi_m(\mathbf{x})^\top \quad (31)$$

$$= \sum_{m=1}^N \sigma_m \phi_m(\mathbf{x}) \phi_m(\mathbf{x})^\top + \sum_{m=N+1}^{+\infty} \sigma_m \phi_m(\mathbf{x}) \phi_m(\mathbf{x})^\top. \quad (32)$$

Moreover, observe that

$$\mathbf{K}_N(\mathbf{x}) = \sum_{m=1}^N \sigma_m \phi_m(\mathbf{x}) \phi_m(\mathbf{x})^\top, \quad (33)$$

and

$$\mathbf{K}_N^\perp(\mathbf{x}) = \sum_{m=N+1}^{+\infty} \sigma_m \phi_m(\mathbf{x}) \phi_m(\mathbf{x})^\top. \quad (34)$$

Therefore

$$\mathbf{K}(\mathbf{x}) = \mathbf{K}_N(\mathbf{x}) + \mathbf{K}_N^\perp(\mathbf{x}), \quad (35)$$

so that

$$\hat{\mathbf{w}}^{\text{EZ},g^\top} \mathbf{K}(\mathbf{x}) \hat{\mathbf{w}}^{\text{EZ},g} = \hat{\mathbf{w}}^{\text{EZ},g^\top} \mathbf{K}_N(\mathbf{x}) \hat{\mathbf{w}}^{\text{EZ},g} + \hat{\mathbf{w}}^{\text{EZ},g^\top} \mathbf{K}_N^\perp(\mathbf{x}) \hat{\mathbf{w}}^{\text{EZ},g}. \quad (36)$$

In order to evaluate  $\hat{\mathbf{w}}^{\text{EZ},g^\top} \mathbf{K}_N(\mathbf{x}) \hat{\mathbf{w}}^{\text{EZ},g}$ , we use Proposition 2, and we get

$$\hat{\mathbf{w}}^{\text{EZ},g} = \mathbf{K}_N(\mathbf{x})^{-1} \mu_g(\mathbf{x}), \quad (37)$$

so that

$$\begin{aligned} \hat{\mathbf{w}}^{\text{EZ},g^\top} \mathbf{K}_N(\mathbf{x}) \hat{\mathbf{w}}^{\text{EZ},g} &= \hat{\mathbf{w}}^{\text{EZ},g^\top} \mathbf{K}_N(\mathbf{x}) \mathbf{K}_N(\mathbf{x})^{-1} \mu_g(\mathbf{x}) \\ &= \hat{\mathbf{w}}^{\text{EZ},g^\top} \mu_g(\mathbf{x}) \\ &= \|\mu_g\|_{\mathcal{F}}^2. \end{aligned} \quad (38)$$

Finally, by definition

$$\hat{\boldsymbol{w}}^{\text{EZ},g} = \boldsymbol{\Phi}_N(\boldsymbol{x})^{-1}\boldsymbol{\epsilon}, \quad (39)$$

where  $\boldsymbol{\epsilon} = \sum_{n \in [N]} \langle g, \phi_n \rangle_{\omega} \boldsymbol{e}_n$ . Therefore

$$\hat{\boldsymbol{w}}^{\text{EZ},g\top} \boldsymbol{K}_N(\boldsymbol{x})^{\perp} \hat{\boldsymbol{w}}^{\text{EZ},g} = \boldsymbol{\epsilon}^{\top} \boldsymbol{\Phi}_N(\boldsymbol{x})^{-1\top} \boldsymbol{K}_N(\boldsymbol{x})^{\perp} \boldsymbol{\Phi}_N(\boldsymbol{x})^{-1} \boldsymbol{\epsilon}. \quad (40)$$

#### A.4 Proof of Theorem 7

Let  $m \in \mathbb{N}^*$  such that  $m \geq N + 1$ . We prove that

$$\forall \boldsymbol{\epsilon}, \tilde{\boldsymbol{\epsilon}} \in \mathbb{R}^N, \quad \mathbb{E}_{\text{DPP}} \boldsymbol{\epsilon}^{\top} \boldsymbol{\Phi}_N(\boldsymbol{x})^{-1\top} \phi_m(\boldsymbol{x}) \phi_m(\boldsymbol{x})^{\top} \boldsymbol{\Phi}_N(\boldsymbol{x})^{-1} \tilde{\boldsymbol{\epsilon}} = \sum_{n \in [N]} \epsilon_n \tilde{\epsilon}_n. \quad (41)$$

For this purpose, let  $\boldsymbol{\epsilon}, \tilde{\boldsymbol{\epsilon}} \in \mathbb{R}^N$ , and observe that

$$\boldsymbol{\epsilon}^{\top} \boldsymbol{\Phi}_N(\boldsymbol{x})^{-1\top} \phi_m(\boldsymbol{x}) = \sum_{n \in [N]} \epsilon_n \boldsymbol{e}_n^{\top} \boldsymbol{\Phi}_N(\boldsymbol{x})^{-1\top} \phi_m(\boldsymbol{x}) \quad (42)$$

$$= \sum_{n \in [N]} \epsilon_n \hat{\boldsymbol{w}}^{\text{EZ},n} \phi_m(\boldsymbol{x}) \quad (43)$$

$$= \sum_{n \in [N]} \epsilon_n I^{\text{EZ},n}(\phi_m). \quad (44)$$

and

$$\phi_m(\boldsymbol{x})^{\top} \boldsymbol{\Phi}_N(\boldsymbol{x})^{-1} \tilde{\boldsymbol{\epsilon}} = \sum_{n \in [N]} \tilde{\epsilon}_n I^{\text{EZ},n}(\phi_m). \quad (45)$$

Therefore

$$\boldsymbol{\epsilon}^{\top} \boldsymbol{\Phi}_N(\boldsymbol{x})^{-1\top} \phi_m(\boldsymbol{x}) \phi_m(\boldsymbol{x})^{\top} \boldsymbol{\Phi}_N(\boldsymbol{x})^{-1} \tilde{\boldsymbol{\epsilon}} = \sum_{n \in [N]} \sum_{n' \in [N]} \epsilon_n \tilde{\epsilon}_{n'} I^{\text{EZ},n}(\phi_m) I^{\text{EZ},n'}(\phi_m), \quad (46)$$

then

$$\mathbb{E}_{\text{DPP}} \boldsymbol{\epsilon}^{\top} \boldsymbol{\Phi}_N(\boldsymbol{x})^{-1\top} \phi_m(\boldsymbol{x}) \phi_m(\boldsymbol{x})^{\top} \boldsymbol{\Phi}_N(\boldsymbol{x})^{-1} \tilde{\boldsymbol{\epsilon}} = \sum_{n \in [N]} \sum_{n' \in [N]} \epsilon_n \tilde{\epsilon}_{n'} \mathbb{E}_{\text{DPP}} I^{\text{EZ},n}(\phi_m) I^{\text{EZ},n'}(\phi_m). \quad (47)$$

Now, for  $n, n' \in [N]$ ,

$$\mathbb{E}_{\text{DPP}} I^{\text{EZ},n}(\phi_m) = \int_{\mathcal{X}} \phi_m(x) \phi_n(x) d\omega(x) = 0, \quad (48)$$

and

$$\mathbb{E}_{\text{DPP}} I^{\text{EZ},n'}(\phi_m) = \int_{\mathcal{X}} \phi_m(x) \phi_{n'}(x) d\omega(x) = 0. \quad (49)$$

Therefore

$$\mathbb{E}_{\text{DPP}} I^{\text{EZ},n}(\phi_m) I^{\text{EZ},n'}(\phi_m) = \text{Cov}_{\text{DPP}}(I^{\text{EZ},n}(\phi_m), I^{\text{EZ},n'}(\phi_m)). \quad (50)$$

Now, by Proposition 1, we have  $\text{Cov}_{\text{DPP}}(I^{\text{EZ},n}(\phi_m), I^{\text{EZ},n'}(\phi_m)) = \delta_{n,n'}$ , so that

$$\mathbb{E}_{\text{DPP}} I^{\text{EZ},n}(\phi_m) I^{\text{EZ},n'}(\phi_m) = \delta_{n,n'}, \quad (51)$$

and

$$\begin{aligned} \mathbb{E}_{\text{DPP}} \boldsymbol{\epsilon}^{\top} \boldsymbol{\Phi}_N(\boldsymbol{x})^{-1\top} \phi_m(\boldsymbol{x}) \phi_m(\boldsymbol{x})^{\top} \boldsymbol{\Phi}_N(\boldsymbol{x})^{-1} \tilde{\boldsymbol{\epsilon}} &= \sum_{n \in [N]} \sum_{n' \in [N]} \epsilon_n \tilde{\epsilon}_{n'} \mathbb{E}_{\text{DPP}} I^{\text{EZ},n}(\phi_m) I^{\text{EZ},n'}(\phi_m) \\ &= \sum_{n \in [N]} \sum_{n' \in [N]} \epsilon_n \tilde{\epsilon}_{n'} \delta_{n,n'} \\ &= \sum_{n \in [N]} \epsilon_n \tilde{\epsilon}_n. \end{aligned} \quad (52)$$

Now, for  $\epsilon \in \mathbb{R}^N$  and  $m \in \mathbb{N}^*$  define  $Y_{\epsilon, m}$  by

$$Y_{\epsilon, m} = \sigma_m \epsilon^\top \Phi_N(\mathbf{x})^{-1\top} \phi_m(\mathbf{x}) \phi_m(\mathbf{x})^\top \Phi_N(\mathbf{x})^{-1} \epsilon. \quad (53)$$

We have

$$\mathbb{E}_{\text{DPP}} Y_{\epsilon, m} = \sigma_m \sum_{n \in [N]} \epsilon_n^2, \quad (54)$$

and the  $Y_{\epsilon, m}$  are non-negative since

$$Y_{\epsilon, m} = \sigma_m (\epsilon^\top \Phi_N(\mathbf{x})^{-1\top} \phi_m(\mathbf{x}))^2 \geq 0, \quad (55)$$

moreover,

$$\sum_{m=N+1}^{+\infty} \mathbb{E}_{\text{DPP}} Y_{\epsilon, m} < +\infty. \quad (56)$$

Therefore, by Beppo Levi's lemma

$$\begin{aligned} \mathbb{E}_{\text{DPP}} \sum_{m=N+1}^{+\infty} Y_{\epsilon, m} &= \sum_{m=N+1}^{+\infty} \mathbb{E}_{\text{DPP}} Y_{\epsilon, m} \\ &= \sum_{n \in [N]} \epsilon_n^2 \sum_{m=N+1}^{+\infty} \sigma_m. \end{aligned} \quad (57)$$

Now, in general for  $m \in \mathbb{N}^*$  such that  $m \geq N+1$ , we have

$$\sigma_m \epsilon^\top \Phi_N(\mathbf{x})^{-1\top} \phi_m(\mathbf{x}) \phi_m(\mathbf{x})^\top \Phi_N(\mathbf{x})^{-1} \tilde{\epsilon} \leq \frac{1}{2} (Y_{\epsilon, m} + Y_{\tilde{\epsilon}, m}), \quad (58)$$

so that for  $M \geq N+1$ , we have

$$\sum_{m=N+1}^M \sigma_m \epsilon^\top \Phi_N(\mathbf{x})^{-1\top} \phi_m(\mathbf{x}) \phi_m(\mathbf{x})^\top \Phi_N(\mathbf{x})^{-1} \tilde{\epsilon} \leq \frac{1}{2} \left( \sum_{m=N+1}^{+\infty} Y_{\epsilon, m} + \sum_{m=N+1}^{+\infty} Y_{\tilde{\epsilon}, m} \right). \quad (59)$$

Therefore, by dominated convergence theorem we conclude that

$$\mathbb{E}_{\text{DPP}} \sum_{m=N+1}^{+\infty} \sigma_m \epsilon^\top \Phi_N(\mathbf{x})^{-1\top} \phi_m(\mathbf{x}) \phi_m(\mathbf{x})^\top \Phi_N(\mathbf{x})^{-1} \tilde{\epsilon} = \sum_{m=N+1}^{+\infty} \sigma_m \sum_{n \in [N]} \epsilon_n \tilde{\epsilon}_n. \quad (60)$$

### A.5 Proof of Theorem 3

Let  $g \in \mathcal{E}_N$ , and denote  $\epsilon = \sum_{n \in [N]} \langle g, \phi_n \rangle_\omega e_n$ . Combining Theorem 6 and Theorem 7, we obtain

$$\mathbb{E}_{\text{DPP}} \left\| \mu_g - \sum_{i \in [N]} \hat{w}_i^{\text{EZ}, g} k(x_i, \cdot) \right\|_{\mathcal{F}}^2 = \sum_{m \geq N+1} \sigma_m \sum_{n \in [N]} \epsilon_n^2. \quad (61)$$

Now let  $g \in \mathcal{L}_2(\omega)$ , we have

$$\left\| \mu_g - \sum_{i \in [N]} \hat{w}_i^{\text{EZ}, g} k(x_i, \cdot) \right\|_{\mathcal{F}}^2 = \left\| \mu_g - \mu_{g_N} + \mu_{g_N} - \sum_{i \in [N]} \hat{w}_i^{\text{EZ}, g} k(x_i, \cdot) \right\|_{\mathcal{F}}^2 \quad (62)$$

$$\leq 2 \left( \left\| \mu_g - \mu_{g_N} \right\|_{\mathcal{F}}^2 + \left\| \mu_{g_N} - \sum_{i \in [N]} \hat{w}_i^{\text{EZ}, g} k(x_i, \cdot) \right\|_{\mathcal{F}}^2 \right), \quad (63)$$

where  $g_N = \sum_{n \in [N]} \langle g, \phi_n \rangle_\omega \phi_n \in \mathcal{E}_N$ .

Now, observe that

$$\mu_g^{\gamma, N} = \mu_{g_N}^{\gamma, N}, \quad (64)$$

so that

$$\hat{w}^{\text{EZ}, g} = \hat{w}^{\text{EZ}, g_N}. \quad (65)$$

Therefore

$$\|\mu_g - \sum_{i \in [N]} \hat{w}_i^{\text{EZ},g} k(x_i, \cdot)\|_{\mathcal{F}}^2 \leq 2 \left( \|\mu_g - \mu_{g_N}\|_{\mathcal{F}}^2 + \|\mu_{g_N} - \sum_{i \in [N]} \hat{w}_i^{\text{EZ},g_N} k(x_i, \cdot)\|_{\mathcal{F}}^2 \right). \quad (66)$$

Now, we have

$$\begin{aligned} \|\mu_g - \mu_{g_N}\|_{\mathcal{F}}^2 &= \sum_{m \geq N+1} \sigma_m \langle g, \phi_m \rangle_{\omega}^2 \\ &\leq \sigma_{N+1} \sum_{m \geq N+1} \langle g, \phi_m \rangle_{\omega}^2 \\ &\leq r_{N+1} \|g\|_{\omega}^2. \end{aligned} \quad (67)$$

Moreover, by (26) we have

$$\begin{aligned} \mathbb{E}_{\text{DPP}} \|\mu_{g_N} - \sum_{i \in [N]} \hat{w}_i^{\text{EZ},g_N} k(x_i, \cdot)\|_{\mathcal{F}}^2 &= \sum_{n \in [N]} \langle g, \phi_n \rangle_{\omega}^2 r_{N+1} \\ &\leq \|g\|_{\omega}^2 r_{N+1}. \end{aligned} \quad (68)$$

Combining (66), (67) and (68), we obtain

$$\|\mu_g - \sum_{i \in [N]} \hat{w}_i^{\text{EZ},g} k(x_i, \cdot)\|_{\mathcal{F}}^2 \leq 4 \|g\|_{\omega}^2 r_{N+1}. \quad (69)$$

## References

- [1] G. Gautier, R. Bardenet, and M. Valko. On two ways to use determinantal point processes for monte carlo integration. In *Advances in Neural Information Processing Systems*, volume 32, 2019.
